# Supplementary material for: Fabrication of Smart Tantalum Carbide MXene Quantum Dots with Intrinsic Immunomodulatory Properties for Treatment of Allograft Vasculopathy
Source: PubMed Central journal article supplement (PMC8820728; doi:10.1002/adfm.202106786), 2021-09-08
Supplement: ADFM-31-0-s001.pdf [file ADFM-31-0-s001.pdf]

# ADVANCED FUNCTIONAL MATERIALS

## Supporting Information

for *Adv. Funct. Mater.*, DOI: 10.1002/adfm.202106786

Fabrication of Smart Tantalum Carbide MXene Quantum Dots with Intrinsic Immunomodulatory Properties for Treatment of Allograft Vasculopathy

*Alireza Rafieerad, Weiang Yan, Keshav Narayan Alagarsamy, Abhay Srivastava, Niketa Sareen, Rakesh C. Arora, and Sanjiv Dhingra\**

## Electronic Supplementary Information

### **Fabrication of Smart Tantalum Carbide MXene Quantum Dots with Intrinsic Immunomodulatory Properties for Treatment of Allograft Vasculopathy**

**Alireza Rafieerad<sup>a,b,#</sup>, Weiang Yan<sup>a,b,c,#</sup>, Keshav Narayan Alagarsamy<sup>a,b</sup>, Abhay Srivastava<sup>a,b</sup>, Niketa Sareen<sup>a,b</sup>, Rakesh C. Arora<sup>b,c</sup>, Sanjiv Dhingra<sup>a,b,\*</sup>**

*<sup>a</sup> Regenerative Medicine Program, Department of Physiology and Pathophysiology, Rady Faculty of Health Sciences, University of Manitoba, Winnipeg, Manitoba, R3E 0W2, Canada*

*<sup>b</sup> Institute of Cardiovascular Sciences, Albrechtsen St. Boniface Research Centre, University of Manitoba, Winnipeg, Manitoba, R2H 2A6, Canada*

*<sup>c</sup> Section of Cardiac Surgery, Department of Surgery, Max Rady College of Medicine, Rady Faculty of Health Sciences, University of Manitoba, Winnipeg, Manitoba, R3E 0W2, Canada*

*<sup>#</sup> A.R and W.Y contributed equally to this work.*

#### **\*Correspondence:**

**Sanjiv Dhingra, PhD, FAHA, FAPS**

Regenerative Medicine Program

Director: Canada Italy Tissue Engineering Program

Institute of Cardiovascular Sciences, St. Boniface Hospital Research Centre

R-3028-2, 351 Tache Avenue, Winnipeg, R2H2A6, Canada

Email: sdhingra@sbrcc.ca

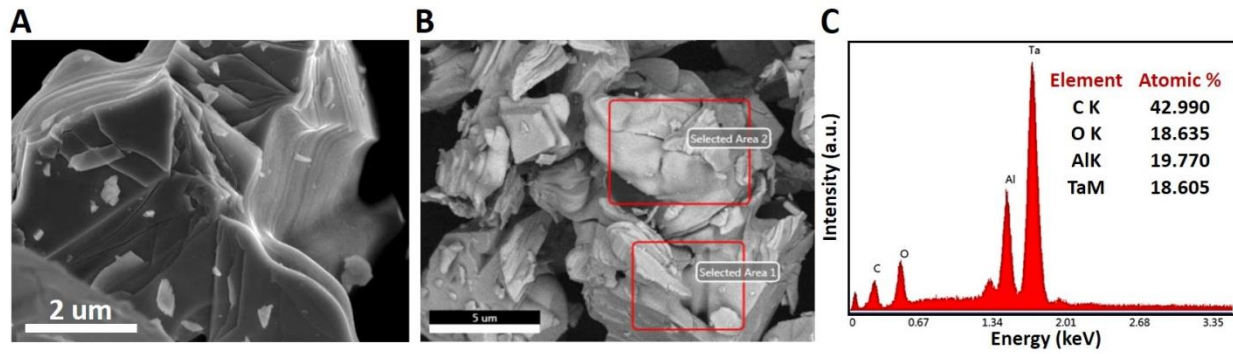

**Supplementary Figure S1: Morphology and elemental composition characterization of Ta<sub>4</sub>AlC<sub>3</sub> MAX phase.** (A) FESEM image showing the microstructure of Ta<sub>4</sub>AlC<sub>3</sub> MAX phase bulk before etching with the HCl/NaF. (B, C) Back-scattered SEM image and EDS analyses of Ta<sub>4</sub>AlC<sub>3</sub> MAX phase to evaluate its elemental composition. The EDS histogram revealed C, Ta, O, and Al as the main elements. In particular, EDS results confirmed significant Al layers in the material structure, with an atomic percentage of ~ 20%.

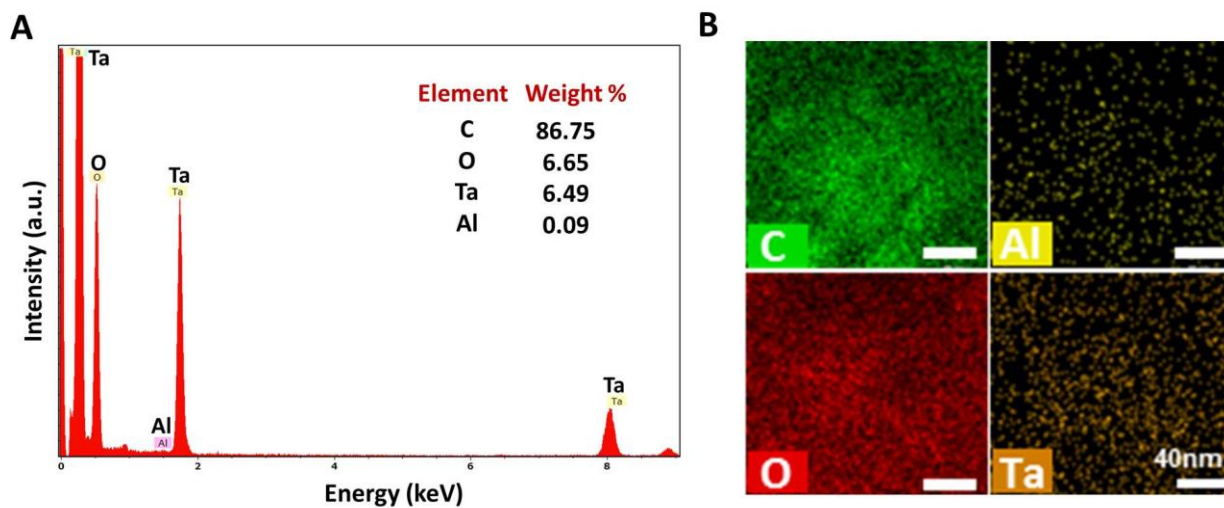

**Supplementary Figure S2: Elemental composition analysis of the HCl/NaF exfoliated  $Ta_4C_3T_x$  MXene nanosheets.** (A) EDS histogram showed C, Ta, and O as the main elemental composition of the etched nanosheets. The weight percentage of Al ( $\sim 0.1\%$ ) confirmed that our innovative protocol could etch and exfoliate the  $Ta_4AlC_3$  MAX phase to MXene nanosheets. (B) EDS mapping further demonstrated the distribution of C, Ta, and O within the  $Ta_4C_3T_x$  MXene nanosheets.

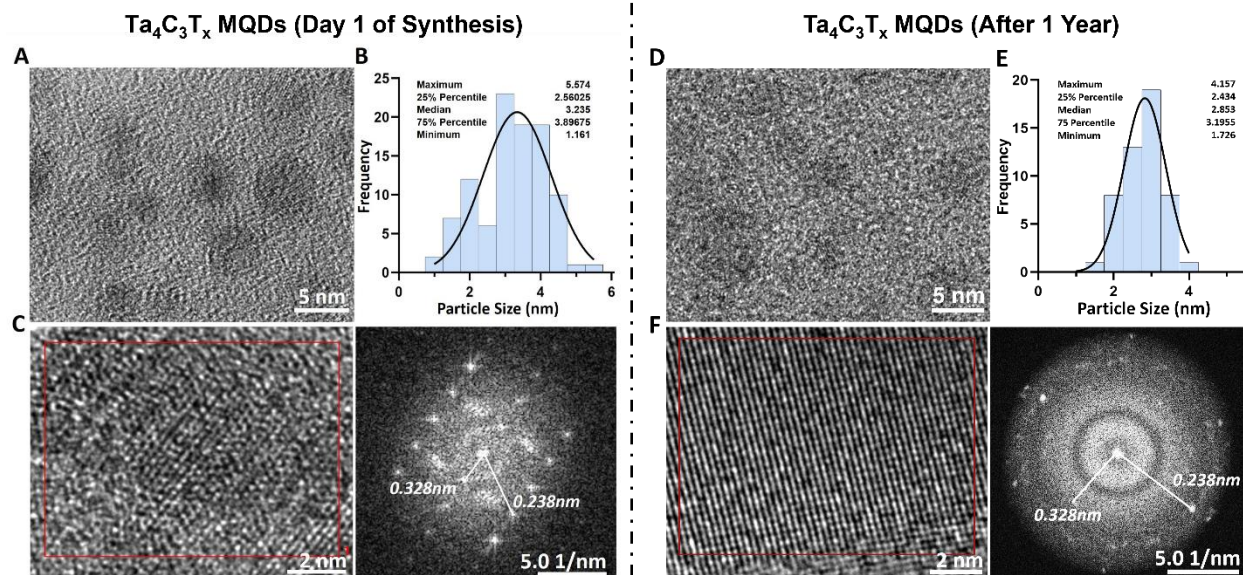

**Supplementary Figure S3: Size and crystallinity of Ta<sub>4</sub>C<sub>3</sub>T<sub>x</sub> MQDs.** (A, B) High-resolution TEM (HRTEM) micrograph of MQDs revealed uniform distribution of particles with a median size of 3.233 nm. The statistical analysis and frequency histogram revealed that the maximum particle size of a single MQD is 5.574 nm. This geometry was specifically obtained by the applied hydrothermal treatment and can be varied at different processing temperatures. (C) The HRTEM image and corresponding fast Fourier transform (FFT) pattern for a single Ta<sub>4</sub>C<sub>3</sub>T<sub>x</sub> MQD demonstrated a highly crystalline 0D material with lattice d-spacing of 0.328 nm (inner plane: 0.238 nm). Our FFT data illustrate the orientation of the MQDs that demonstrates the crystalline structure of the material. (D-F) HRTEM and FFT of Ta<sub>4</sub>C<sub>3</sub>T<sub>x</sub> MQDs at 1 year after synthesis revealed no significant changes compared to the initial measurements, confirming the long-term stability and shelf-life of as-synthesized quantum dots.

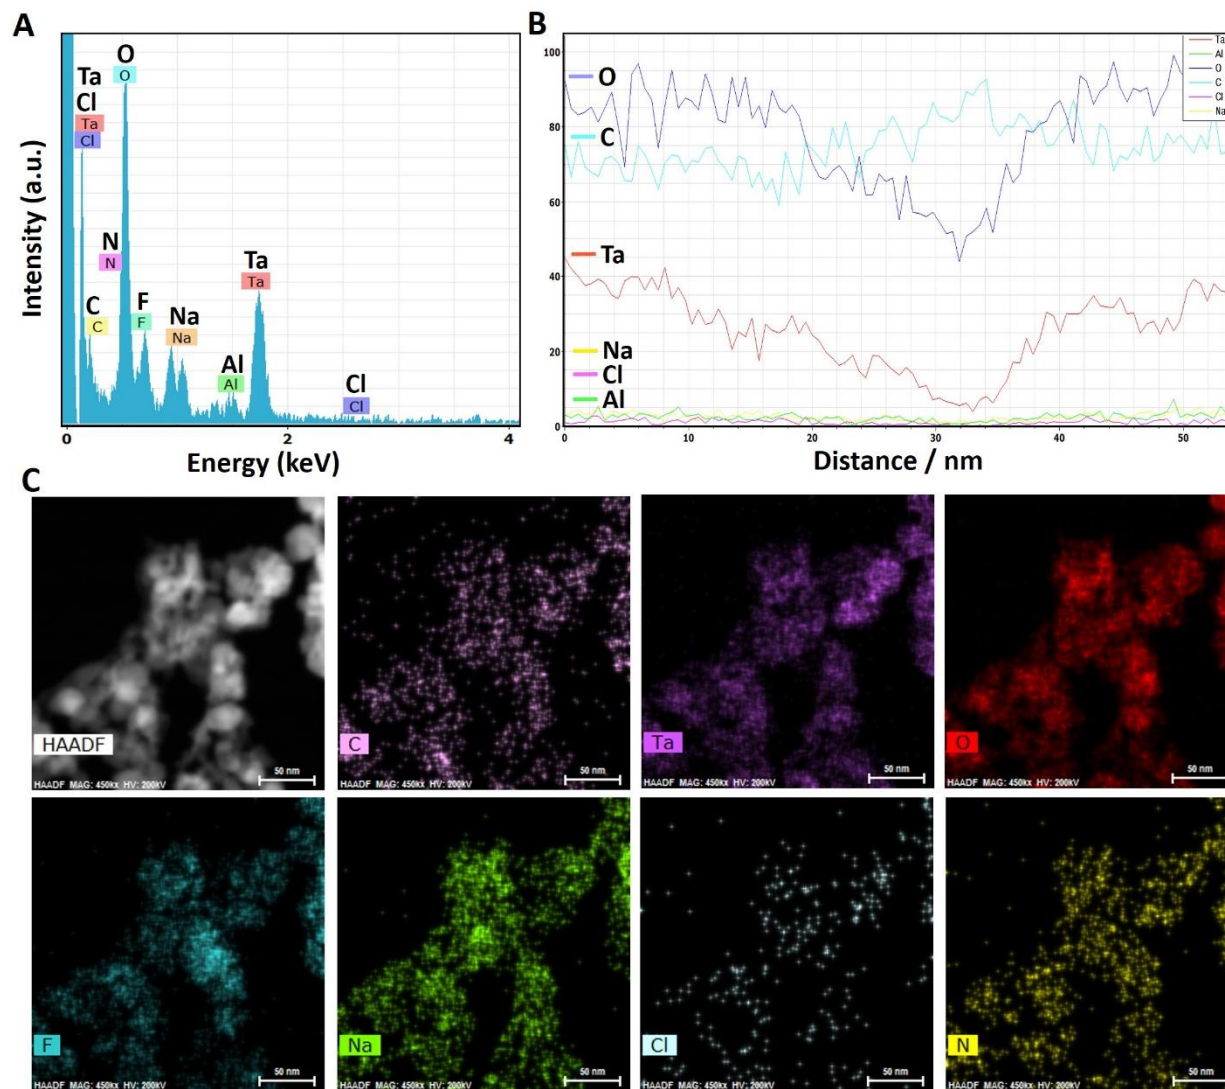

**Supplementary Figure S4: Elemental composition analysis of as-synthesized  $Ta_4C_3T_x$  MQDs.** (A) The EDS point and (B) line scan analysis of MQDs showed that the main elemental composition of the particles included Ta, C, O, F, and Na. This suggested that the employed fabrication method in the current study was effective, and the Al layers were significantly removed during the synthesis process. Also, the low concentration of Cl in the MQDs composition confirms the efficiency of HCl to synthesize MXene materials. The relatively higher concentration of Na and F in elemental map describes the bonding in MQDs structure. (C) The scanning TEM image and EDS mapping of MQDs further showing the elemental composition.

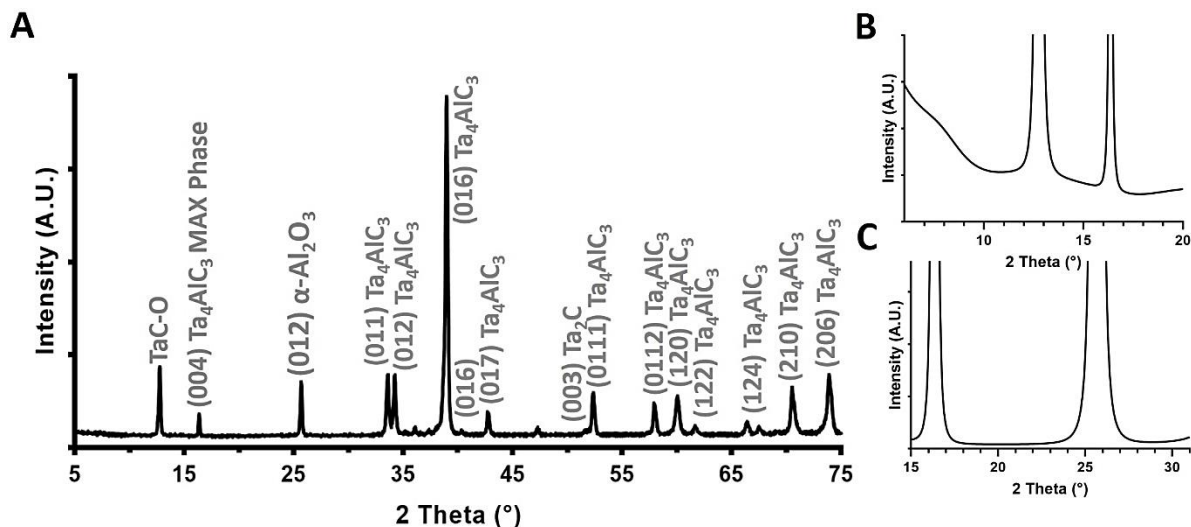

**Supplementary Figure S5: XRD phase characterization of pristine Ta<sub>4</sub>AlC<sub>3</sub> MAX phase.** (A-C) The XRD analysis of bulky Ta<sub>4</sub>AlC<sub>3</sub> MAX phase revealed its crystalline structure with significant presence of Al. The XRD spectra of MAX phase contains a dominant peak at ~ 16° 2θ. The phase pattern of Ta<sub>4</sub>AlC<sub>3</sub> includes a contamination peak of tantalum carbide (Ta<sub>2</sub>C) at ~ 50° 2θ. These data are in agreement with the standard XRD structure of Ta<sub>4</sub>AlC<sub>3</sub> MAX phase. The peaks of the tantalum aluminium carbide were matched with a standard XRD pattern (ICSD156383, 96-210-3218, α-alumina).

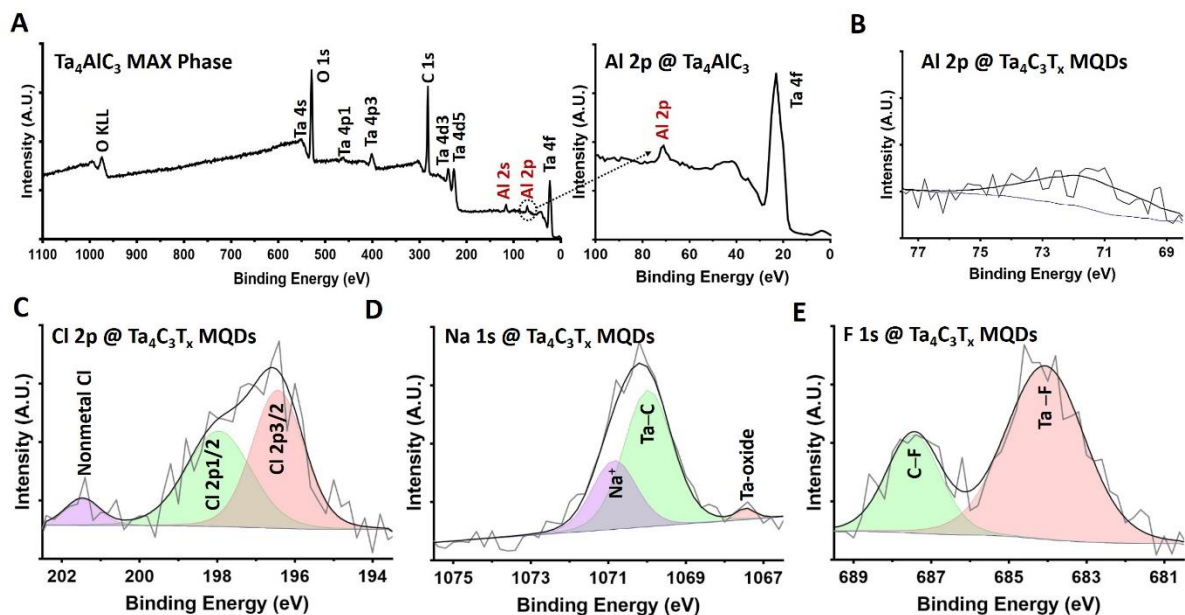

**Supplementary Figure S6: XPS characterization of  $Ta_4AlC_3$  MAX phase and  $Ta_4C_3T_x$  MQDs.**

(A) Wide scan survey of the MAX phase showing its surface composition. The XPS measurement detected a significant amount of Al in MAX phase with an atomic percentage of 3.19. The presence of atomic oxygen in the MQDs increased from 33.15% in MAX phase to 43.51% in MQDs (**Figure 2E**). (B) The Al 2p XPS narrow scan spectrum of  $Ta_4C_3T_x$  MQDs displayed significant removal of Al from the material. (C-E) The Cl 2p, Na 1s, and F 1s spectra of  $Ta_4C_3T_x$  MQDs. The F 1s include Ta-F, and C-F bonds at the binding energies of 684.06 and 687.45. This provided further support that our innovative protocol successfully synthesized, and surface functionalized the MQDs.



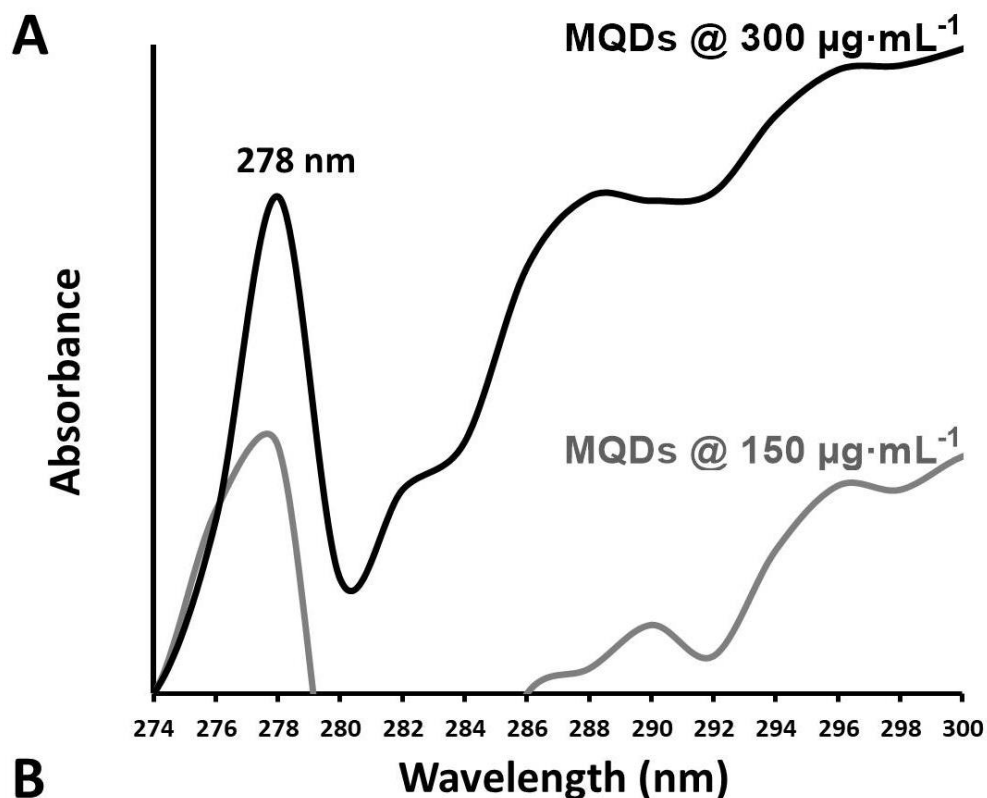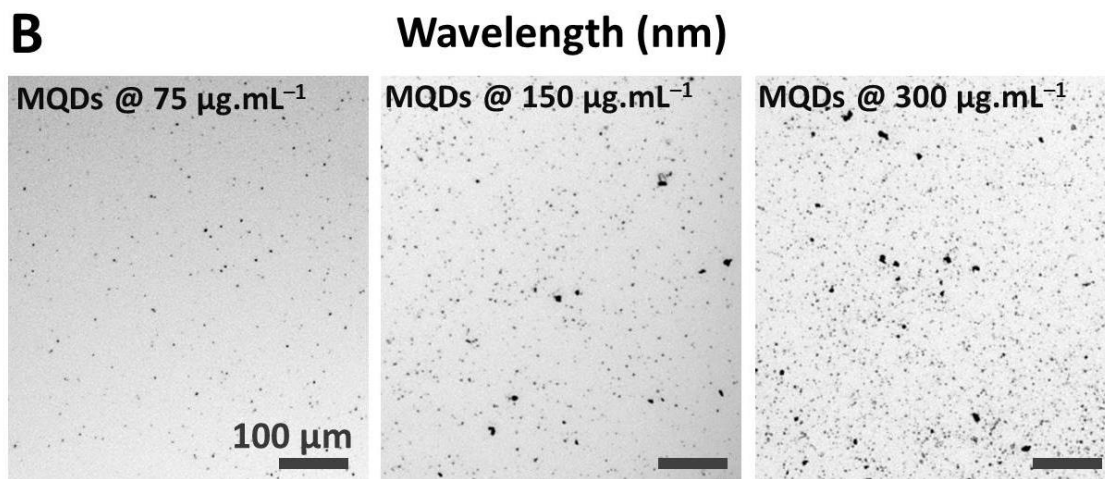

**Supplementary Figure S7: Assessment of optical absorption of  $\text{Ta}_4\text{C}_3\text{T}_x$  MQDs.** (A) Our UV-Vis spectrum of MQDs displayed dose-dependent absorption properties with a broad peak at a wavelength of  $\sim 300$  nm. Additionally, when the UV-Vis analysis of  $\text{Ta}_4\text{C}_3\text{T}_x$  MQDs was repeated six months after synthesis, no significant differences were observed in its optical absorption profile. This confirmed adequate stability of as-synthesized MQDs for the targeted biomedical applications. (B) Furthermore, optical microscope images of colloidal  $\text{Ta}_4\text{C}_3\text{T}_x$  MQDs showed high stability in aqueous media without significant agglomeration or precipitation at concentrations up to  $300 \mu\text{g}\cdot\text{mL}^{-1}$ .

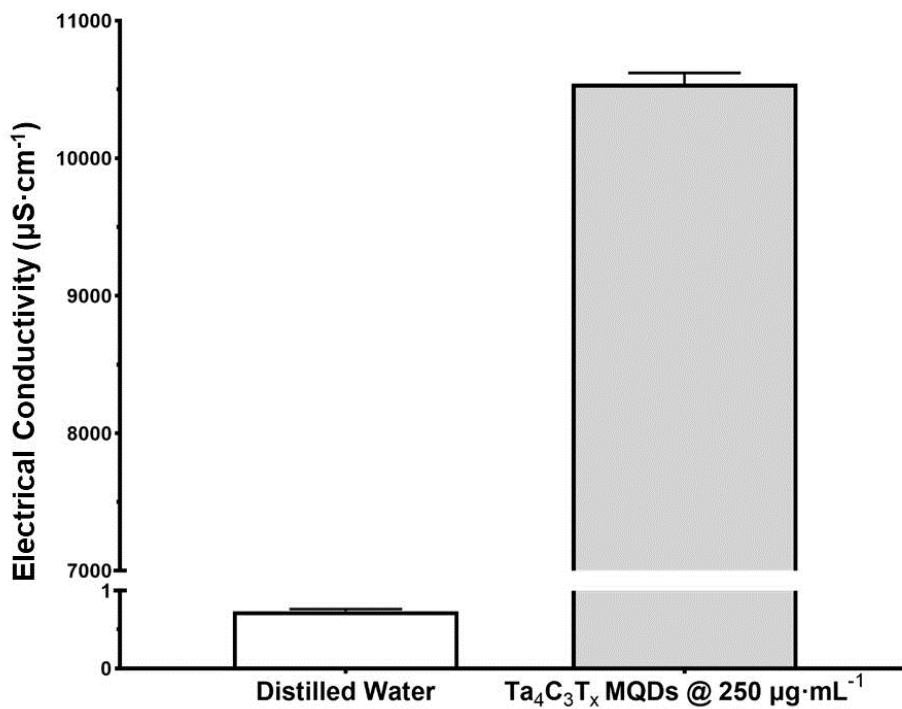

**Supplementary Figure S8: Assessment of electrical conductivity of  $\text{Ta}_4\text{C}_3\text{T}_x$  MQDs.** The electrical conductivity of  $\text{Ta}_4\text{C}_3\text{T}_x$  MQDs as measured by DuraProb 4-Electrode Probe (Thermo Scientific) in an aqueous colloidal dispersion was  $10543 \pm 77 \mu\text{S}\cdot\text{cm}^{-1}$  at a concentration of  $250 \mu\text{g}\cdot\text{mL}^{-1}$ , compared to  $0.737 \pm 0.027 \mu\text{S}\cdot\text{cm}^{-1}$  for distilled water measured under the same conditions.

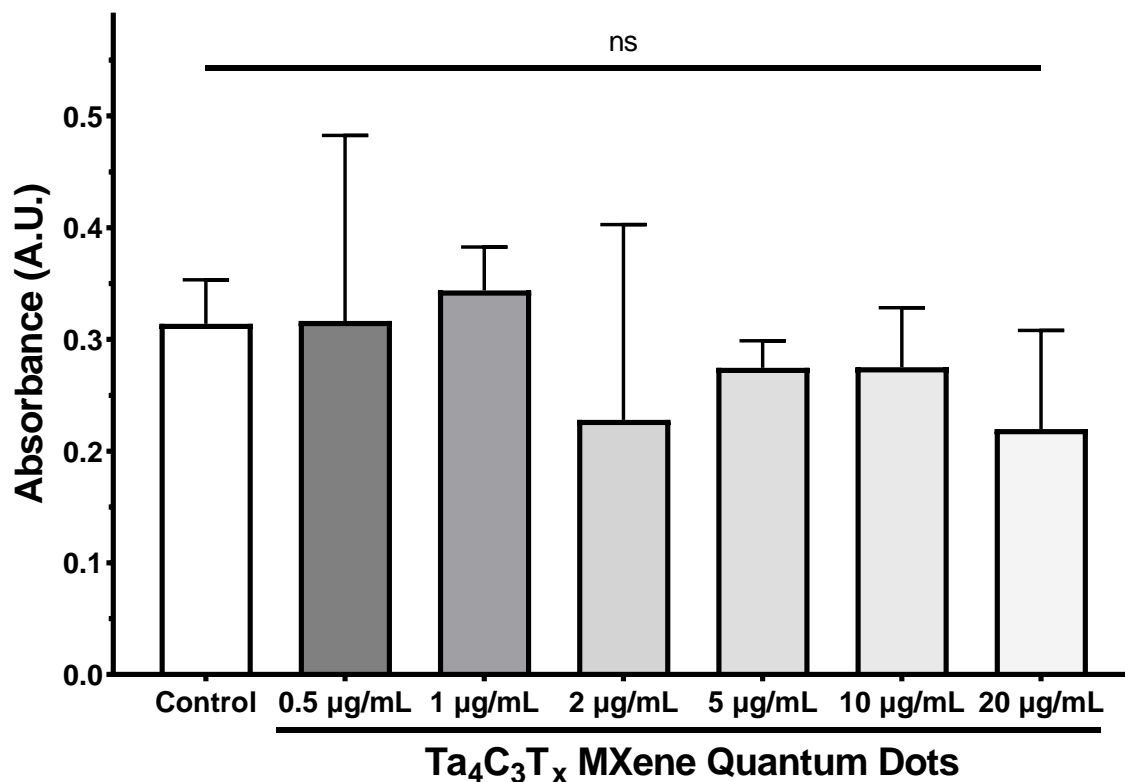

**Supplementary Figure S9:** *Assessment of lactate dehydrogenase release from endothelial cells cultured with  $Ta_4C_3T_x$  MQDs at 7 days.* No significant differences were observed in cytotoxicity between control cells and those treated with 0.5 to 20  $\mu\text{g}\cdot\text{mL}^{-1}$  of  $Ta_4C_3T_x$  MQDs.

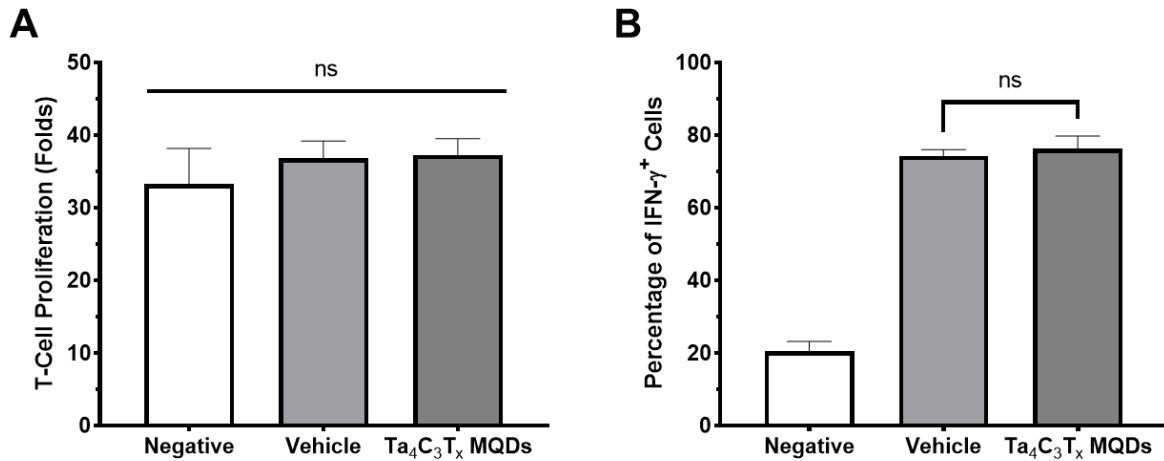

**Supplementary Figure S10: Co-culture of activated and polarized naïve human CD4<sup>+</sup> lymphocytes with Ta<sub>4</sub>C<sub>3</sub>T<sub>x</sub> MQDs.** Naïve human CD4<sup>+</sup> T-lymphocytes were isolated using negative magnetic activated cell sorting and activated/polarized using plate-bound anti-CD3, soluble anti-CD28, and exogenous IL-2 and IL-12 in the presence and absence of Ta<sub>4</sub>C<sub>3</sub>T<sub>x</sub> MQDs. **(A)** After 7 days, no significant differences were observed in the degree of T-cell proliferation and **(B)** percentage of T<sub>H</sub>1 (IFN- $\gamma$ <sup>+</sup>) CD4<sup>+</sup> T-lymphocytes between cells treated with and without Ta<sub>4</sub>C<sub>3</sub>T<sub>x</sub> MQDs.

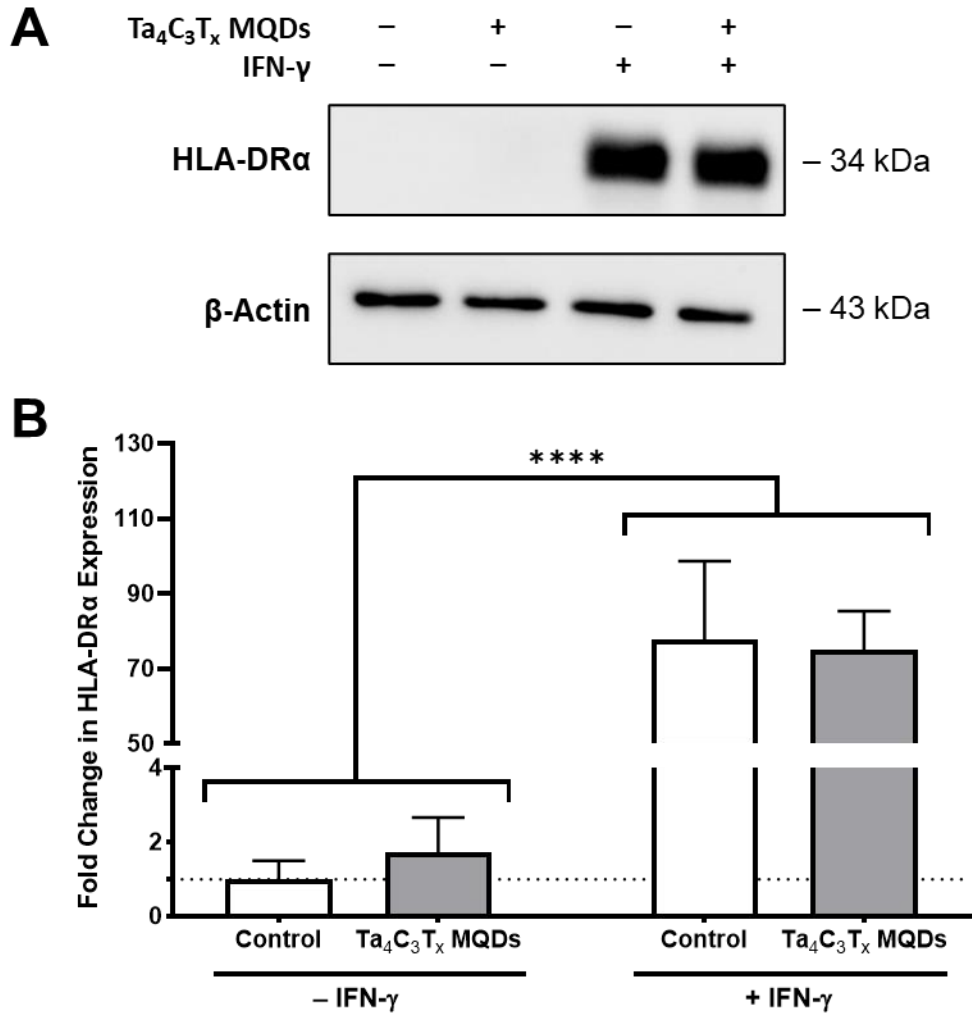

**Supplementary Figure S11: Activation of human umbilical vein endothelial cells by interferon gamma (IFN- $\gamma$ ) after 24 hours.** HLA-DR $\alpha$  expression was normalized to  $\beta$ -actin expression in order to assess endothelial activation and antigen presentation induced by IFN- $\gamma$ . (A-B) As shown by Western Blot analysis, addition of 10 units·mL<sup>-1</sup> of recombinant IFN- $\gamma$  induced robust activation of human umbilical vein endothelial cells in both control cells and those treated with 20  $\mu$ g·mL<sup>-1</sup> of Ta<sub>4</sub>C<sub>3</sub>T<sub>x</sub> MQDs ( $p < 0.001$  for the comparison shown).

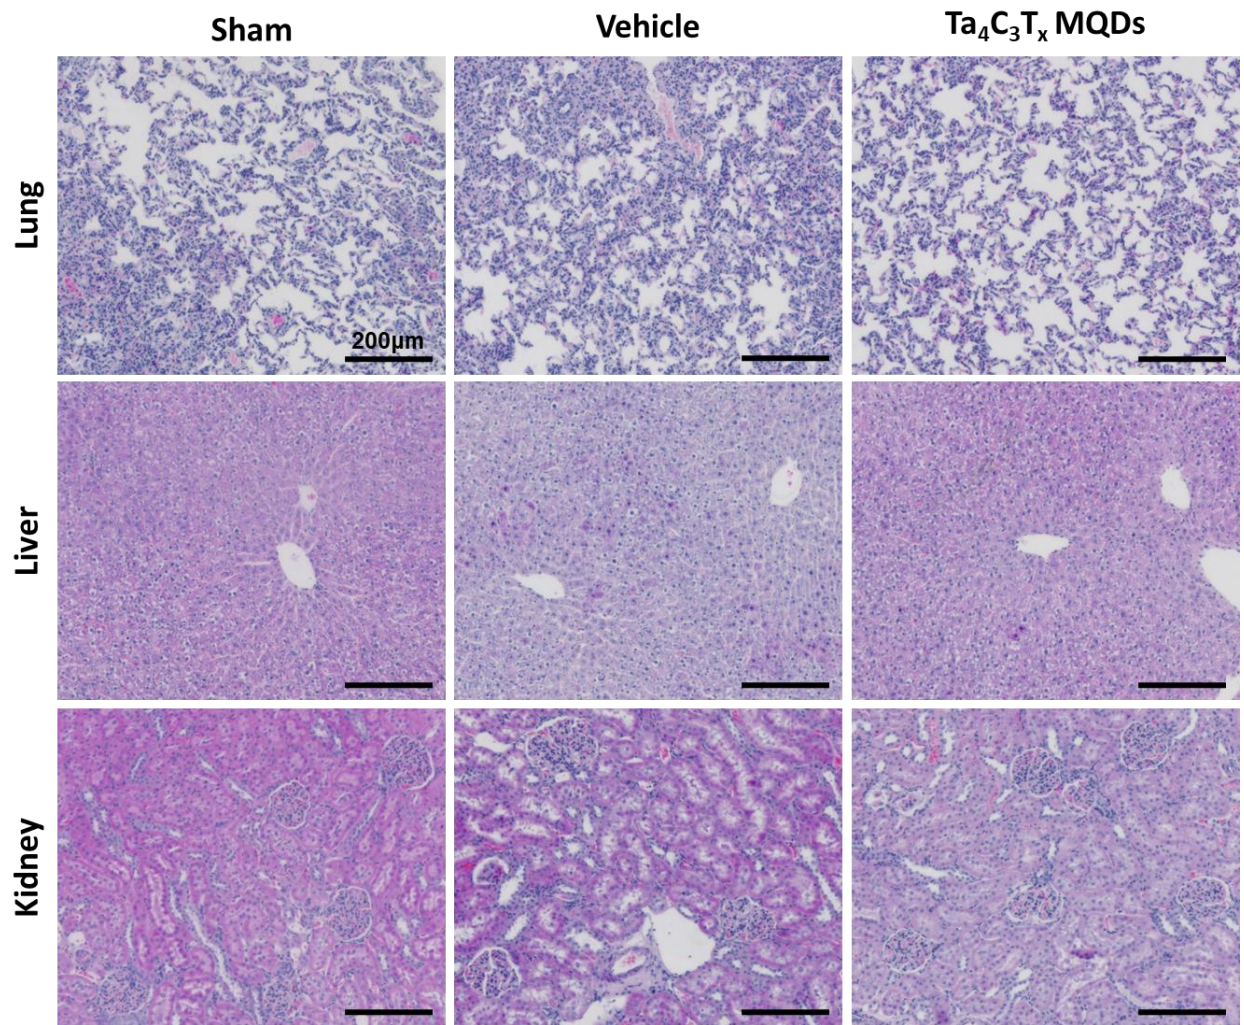

**Supplementary Figure S12: *Histologic assessment of the lung, liver, and kidney from animals undergoing aortic transplantation and Ta<sub>4</sub>C<sub>3</sub>T<sub>x</sub> MQDs injection.*** No gross histologic changes were observed on H&E staining of sections from these organs.

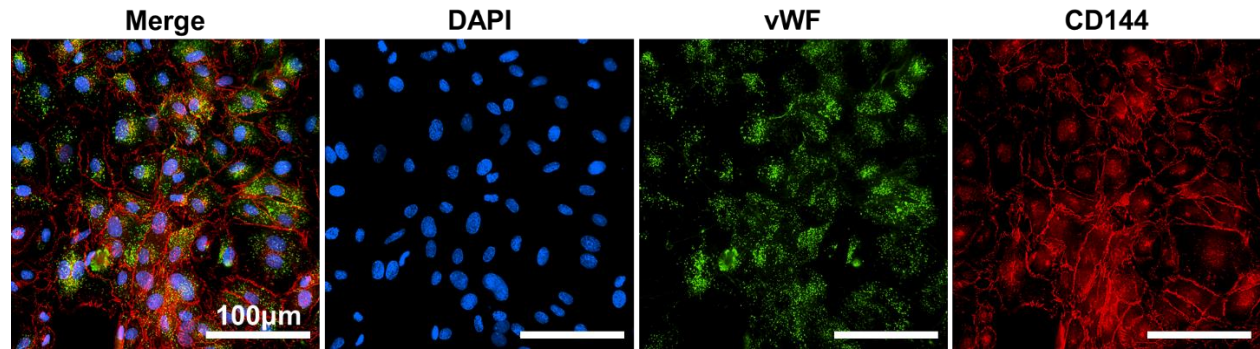

**Supplementary Figure S13: *Characterization of human umbilical vein endothelial cells used for in vitro experiments.*** Cells were characterized by the commercial vendor as 100% double positive for PECAM-1 (CD31) and Endoglin (CD105) and were additionally tested in our study to be strongly positive for both von Willebrand factor (vWF) and VE-Cadherin (CD144). This is in keeping with the expected surface marker expression for HUVECs.

**Supplementary Table S1: XPS peak fitting results for  $Ta_4C_3T_x$  MQDs.** The XPS wide scan atomic percentage of  $Ta_4C_3T_x$  MQDs and its  $Ta_4AlC_3$  MAX phase. Peak fitting results for  $Ta_4C_3T_x$  MQDs are also presented here.

| Sample                                               | Elements                                                                            | Overall Atomic %            | Component Name                                            | Binding Energy (eV) | Component Atomic % | FWHM (eV) |
|------------------------------------------------------|-------------------------------------------------------------------------------------|-----------------------------|-----------------------------------------------------------|---------------------|--------------------|-----------|
| <i>Ta<sub>4</sub>C<sub>3</sub>T<sub>x</sub> MQDs</i> | Ta 4f <sub>7/2</sub><br>(4f <sub>5/2</sub> )                                        | 9.72                        | Ta-C <sub>x</sub>                                         | 21.57               | 1.2                | 2.37      |
|                                                      |                                                                                     |                             | Ta <sup>4+</sup> -O (TaO <sub>2 7/2</sub> )               | 24.49               | 32.06              | 1.29      |
|                                                      |                                                                                     |                             | Ta-C <sub>x</sub>                                         | 24.89               | 30.6               | 2.25      |
|                                                      |                                                                                     |                             | Ta <sup>4+</sup> -O (TaO <sub>2 5/2</sub> )               | 26.31               | 17.4               | 1.15      |
|                                                      |                                                                                     |                             | Ta <sup>5+</sup> -O (Ta <sub>2</sub> O <sub>5 7/2</sub> ) | 26.78               | 18.13              | 1.48      |
|                                                      |                                                                                     |                             | Ta <sup>5+</sup> -O (Ta <sub>2</sub> O <sub>5 5/2</sub> ) | 28.79               | 0.61               | 0.78      |
|                                                      | C 1s                                                                                | 40.77                       | C-Ta                                                      | 281.22              | 0.09               | 1.02      |
|                                                      |                                                                                     |                             | C-Ta                                                      | 283.23              | 45.81              | 1.31      |
|                                                      |                                                                                     |                             | C=C                                                       | 283.76              | 13.89              | 1.77      |
|                                                      |                                                                                     |                             | C-C                                                       | 285.12              | 32.39              | 1.33      |
|                                                      |                                                                                     |                             | C-N                                                       | 286.22              | 4.58               | 0.98      |
|                                                      |                                                                                     |                             | C-O                                                       | 287.02              | 3.16               | 1.69      |
|                                                      |                                                                                     |                             | C=O                                                       | 288.7               | 0.08               | 0.62      |
|                                                      |                                                                                     |                             | O 1s                                                      | 43.51               | Ta-Oxide           | 528.55    |
|                                                      | Ta <sub>4</sub> C <sub>3</sub> O <sub>x</sub>                                       | 529.66                      |                                                           |                     | 8.29               | 1.61      |
|                                                      | Ta <sub>4</sub> C <sub>3</sub> (OH) <sub>x</sub>                                    | 531.42                      |                                                           |                     | 81.1               | 1.99      |
|                                                      | H <sub>2</sub> O <sub> ads</sub> / Ta <sub>4</sub> C <sub>3</sub> (OH) <sub>x</sub> | 534.6                       |                                                           |                     | 1.53               | 1.79      |
|                                                      | F 1s                                                                                | 2.42                        | Ta-F                                                      | 684.06              | 71.82              | 2.39      |
|                                                      |                                                                                     |                             | C-F                                                       | 687.45              | 28.18              | 1.65      |
|                                                      | Cl 2p <sub>3/2</sub><br>(2p <sub>1/2</sub> )                                        | 1.81                        | Cl 2p                                                     | 196.44              | 88.46              | 1.56      |
| Nonmetal Cl                                          |                                                                                     |                             | 201.48                                                    | 11.54               | 1.06               |           |
| Na 1s                                                | 1.35                                                                                | Ta-Oxide                    | 1067.45                                                   | 1.86                | 0.54               |           |
|                                                      |                                                                                     | Ta-C                        | 1069.97                                                   | 67.07               | 1.47               |           |
|                                                      |                                                                                     | Na <sup>+</sup> ions (NaCl) | 1070.85                                                   | 31.07               | 1.35               |           |
| N 1s                                                 | 0.43                                                                                |                             |                                                           |                     |                    |           |
|                                                      |                                                                                     | Al 2p                       | 0.00                                                      |                     |                    |           |
| <i>Ta<sub>4</sub>AlC<sub>3</sub> MAX Phase</i>       | Ta 4f <sub>7/2</sub><br>(4f <sub>5/2</sub> )                                        | 32.15                       |                                                           |                     |                    |           |
|                                                      | C 1s                                                                                | 33.15                       |                                                           |                     |                    |           |
|                                                      | O 1s                                                                                | 31.51                       |                                                           |                     |                    |           |
|                                                      | Al 2p                                                                               | 3.19                        |                                                           |                     |                    |           |



**Supplementary Table S2:** List of western blotting antibodies used in this study.

| <b>Antibody Name</b>              | <b>Vendor</b>            | <b>Catalog Number</b> | <b>Dilution</b> |
|-----------------------------------|--------------------------|-----------------------|-----------------|
| Anti-HLA-DR $\alpha$ antibody     | Santa Cruz Biotechnology | sc-55592              | 1:200           |
| HRP anti- $\beta$ -actin antibody | Santa Cruz Biotechnology | sc-47778              | 1:10,000        |
| HRP anti-mouse secondary          | Bio-Rad Laboratories     | 1706516               | 1:10,000        |

**Supplementary Table S3:** List of flow cytometry antibodies used in this study.

| <b>Antibody Name</b>              | <b>Clone</b> | <b>Vendor</b> | <b>Catalog Number</b> | <b>Quantity<br/>(for 10<sup>6</sup> cells in 100 <math>\mu</math>L)</b> |
|-----------------------------------|--------------|---------------|-----------------------|-------------------------------------------------------------------------|
| PE anti-human CD3                 | UCHT1        | BioLegend     | 300456                | 0.5 $\mu$ g                                                             |
| FITC anti-human CD4               | RPA-T4       | BioLegend     | 300506                | 2 $\mu$ g                                                               |
| PerCP anti-human IFN- $\gamma$    | 4S.B3        | BioLegend     | 502524                | 0.5 $\mu$ g                                                             |
| AF647 anti-human IL-4             | 8D4-8        | BioLegend     | 500712                | 0.25 $\mu$ g                                                            |
| FITC anti-rat CD4                 | W3/25        | BioLegend     | 201505                | 0.25 $\mu$ g                                                            |
| PE anti-rat CD25                  | OX-39        | BioLegend     | 202105                | 0.25 $\mu$ g                                                            |
| PE mouse IgG1 $\kappa$ isotype    | MOPC-21      | BioLegend     | 400111                | n/a                                                                     |
| FITC mouse IgG1 $\kappa$ isotype  | MOPC-21      | BioLegend     | 400107                | n/a                                                                     |
| PerCP mouse IgG1 $\kappa$ isotype | MOPC-21      | BioLegend     | 400147                | n/a                                                                     |
| AF647 mouse IgG1 $\kappa$ isotype | MOPC-21      | BioLegend     | 400135                | n/a                                                                     |

**Supplementary Table S4:** List of quantitative PCR primers used in this study.

| <b>Human Gene</b> | <b>Strand</b> | <b>Sequence (5' to 3')</b>     |
|-------------------|---------------|--------------------------------|
| NF-κB (p65)       | <i>s</i>      | GCT GCA TCC ACA GTT TCC AGA    |
|                   | <i>as</i>     | CCC CAC GCT GCT CTT CTA T      |
| IRF1              | <i>s</i>      | CCT CCA CCT CTG AAG CTA CAA C  |
|                   | <i>as</i>     | CCA TCC ACG TTT GTT GGC TG     |
| TAP1              | <i>s</i>      | TCG TTG TCA GTT ATG CAG CG     |
|                   | <i>as</i>     | AAT GGC CAT CTC CCC AAG AG     |
| HLA-A             | <i>s</i>      | GAG TAT TGG GAC CAG GAG ACA C  |
|                   | <i>as</i>     | CCA CGT CGC AGC CAT ACA TTA    |
| B2M               | <i>s</i>      | GAT GAG TAT GCC TGC CGT GT     |
|                   | <i>as</i>     | CTG CTT ACA TGT CTC GAT CCC A  |
| VCAM-1            | <i>s</i>      | GGA AAT GAC CTT CAT CCC TAC CA |
|                   | <i>as</i>     | ATC TCT GGG GGC AAC ATT GA     |
| ICAM-1            | <i>s</i>      | AGC TTC GTG TCC TGT ATG GC     |
|                   | <i>as</i>     | TTT TCT GGC CAC GTC CAG TT     |
| PECAM-1           | <i>s</i>      | GCT GAC CCT TCT GCT CTG TT     |
|                   | <i>as</i>     | ATC TGG TGC TGA GGC TTG AC     |
| VE-Cadherin       | <i>s</i>      | CTT CAC CCA GAC CAA GTA CAC A  |
|                   | <i>as</i>     | AAT GGT GAA AGC GTC CTG GT     |
| E-Selectin        | <i>s</i>      | CCG AGC GAG GCT ACA TGA AT     |
|                   | <i>as</i>     | GCA TCG CAT CTC ACA GCT TC     |
| P-Selectin        | <i>s</i>      | CAT CCG CTC ACT GCT TTT GC     |
|                   | <i>as</i>     | AAT CCA TGC TTC CGT GGA CA     |
| FAS Ligand        | <i>s</i>      | CTA CCA GCC AGA TGC ACA CA     |
|                   | <i>as</i>     | CCT TGA GTT GGA CTT GCC TGT    |
| CCL2              | <i>s</i>      | AGA TCT GTG CTG ACC CCA AG     |
|                   | <i>as</i>     | GGA GTT TGG GTT TGC TTG TCC    |
| CXCL9             | <i>s</i>      | GGT GTT CTT TTC CTC TTG GGC    |
|                   | <i>as</i>     | TTC TCA CTA CTG GGG TTC CTT G  |
| CXCL10            | <i>s</i>      | AAG TGG CAT TCA AGG AGT ACC T  |
|                   | <i>as</i>     | GGA CAA AAT TGG CTT GCA GGA    |
| HLA-DR $\alpha$   | <i>s</i>      | ACT CCG ATC ACC AAT GTA CCT C  |
|                   | <i>as</i>     | ACG TTG GGC TCT CTC AGT TC     |
| CIITA             | <i>s</i>      | CAC CAT CCC ATT CAG TGT CCA    |
|                   | <i>as</i>     | TCC AGC GTG GTT AGT GTC CT     |
| PD-L1             | <i>s</i>      | CCT CTG GCA CAT CCT CCA AAT    |
|                   | <i>as</i>     | GCT GGA TTA CGT CTC CTC CAA    |
| CD86              | <i>s</i>      | CGA CGT TTC CAT CAG CTT GTC    |
|                   | <i>as</i>     | TCC AAG GAA TGT GGT CTG GG     |
| ACTB              | <i>s</i>      | CTT CGC GGG CGA CGA T          |
|                   | <i>as</i>     | CCA CAT AGG AAT CCT TCT GAC C  |

**Supplementary Table S5:** List of immunocytochemistry antibodies used in this study.

| <b>Antibody Name</b>                           | <b>Vendor</b>     | <b>Catalog Number</b> | <b>Dilution</b> |
|------------------------------------------------|-------------------|-----------------------|-----------------|
| Mouse anti-rat CD8a                            | Cedarlane         | CL004AP               | 1:100           |
| Goat anti-human/mouse/rabbit/rat $\alpha$ -SMA | Novus Biologicals | NB300-978             | 1:300           |
| Mouse anti-human vWF                           | abcam             | ab201336              | 1:200           |
| Rabbit anti-human VE cadherin                  | abcam             | ab33168               | 1:100           |
| AF488 goat anti-mouse secondary                | Invitrogen        | A-11017               | 1:500           |
| AF647 goat anti-rabbit secondary               | Invitrogen        | A-21246               | 1:500           |
| AF647 goat anti-mouse secondary                | Invitrogen        | A-21237               | 1:500           |
| AF647 donkey anti-goat secondary               | abcam             | ab150135              | 1:500           |

**Supplementary Equation S1, S2:** *The Beer-Lambert Theory* describes UV-Visible absorption arising from the surface of Ta<sub>4</sub>C<sub>3</sub>T<sub>x</sub> MQDs and correlates to its optical properties. The novel  $\alpha$  for the aqueous colloidal dispersion of this material was presented in the manuscript.

$$\text{Absorbance (A)} = \log(I_0/I) = \alpha * L * c \quad (\text{Equation 1})$$

$$\alpha = A / (L * c) \quad (\text{Equation 2})$$

where,

$I_0$  is the intensity of the light on the colloidal suspensions

$\alpha$  refers the absorptivity of the absorber or absorption coefficient

L signifies the path length that the light travels through the sample

c assigns to the concentration of the material.
